# Supplementary material for: Entwicklung und Validierung eines videobasierten Testinstruments zur Erfassung des Noticing mit dem Fokus auf Anerkennungsprozesse im inklusiven Sportunterricht
Source: Springer Nature journal article supplement (doi:10.1007/s12662-022-00807-0), 2022-04-29
Supplement: MOESM1 [file 20359608]

Die Videovignette zeigt einen Ausschnitt aus dem Sportunterricht einer 1. Klasse während der Spielform „Affenkrankenhaus“.

Es handelt sich um eine Fangspielform, bei dem das Erlösen dadurch erfolgt, dass man von anderen Mitspieler\*innen an den Armen und Beinen auf eine Weichbodenmatte getragen wird.

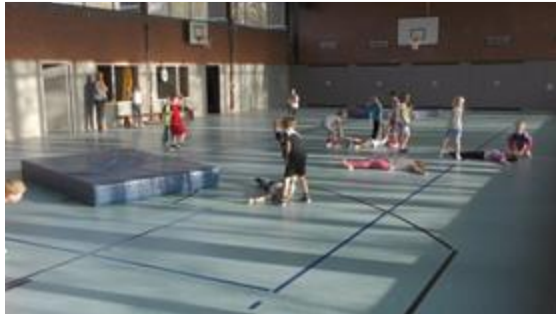

Bitte analysieren Sie die Situation im Hinblick auf Anerkennungs- und Missachtungsprozesse in den Interaktionen und im weiteren sportunterrichtlichen Geschehen.

*Abbildung 1: Beispielhaftes Item 1 zur Erfassung des Noticing mit Fokus auf emotionale Anerkennungsprozesse*

Die Video-Vignette zeigt einen Ausschnitt aus dem Sportunterricht einer 5. Klasse aus der Aufwärmphase.

Die SuS laufen eine vorgegebene Anzahl von Runden im Kreis. Zunächst vorwärts, dann rückwärts. Diejenigen, die die Aufgabe erfüllt haben, warten sitzend im Mittelkreis.

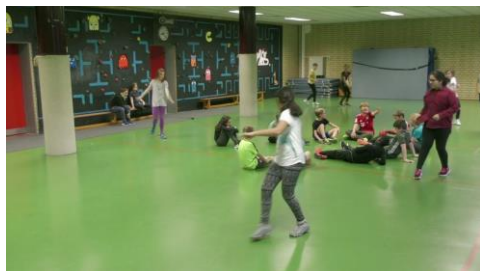

Bitte analysieren Sie die Situation im Hinblick auf Anerkennungs- und Missachtungsprozesse in den Interaktionen und im weiteren sportunterrichtlichen Geschehen.

*Abbildung 2: Beispielhaftes Item 5 zur Erfassung des Noticing mit Fokus auf soziale Anerkennungsprozesse*
